# Supplementary material for: Role of the dew water on the ground surface in HONO distribution: a case measurement in Melpitz
Source: Copernicus journal article supplement (doi:10.5194/acp-2019-1088), 2020-01-30
Supplement: Supplementary file [file acp-2019-1088-AC2-supplement.pdf]

**Interactive comment on “Role of the dew water on the ground surface in HONO distribution: a case measurement in Melpitz” by Yangang Ren et al.**

**Hang Su (Editor)**

[h.su@mpic.de](mailto:h.su@mpic.de)

Received and published: 21 February 2020

"In her/his major concern 3) intercomparison, the referee #1 would also like to point the authors to another recent paper in which also a MARGA system was intercompared with a LOPAP: Xu et al., AMT.12, 6737-6748, 2019, with very similar results to the other reference mentioned there (strong overestimation of HONO by the MARGA).

**Response:** We thank Dr. Su for his comment and this information. Accordingly, Xu et al., 2019 is now referenced and compared with our present result in Line 237-240 “The result is in excellent agreement with the former intercomparison of both instrument types in the Chinese field campaign (Lu et al., 2010; Xu et al., 2019) where the HONO mixing ratio measured with the wet-denuder-ion-chromatography (WD/IC) instrument was affected by a factor of three on average.”

**References**

Lu, K., Zhang, Y., Su, H., Brauers, T., Chou, C. C., Hofzumahaus, A., Liu, S. C., Kita, K., Kondo, Y., Shao, M., Wahner, A., Wang, J., Wang, X., and Zhu, T.: Oxidant (O<sub>3</sub> + NO<sub>2</sub>) production processes and formation regimes in Beijing, *Journal of Geophysical Research: Atmospheres*, 115, 10.1029/2009jd012714, 2010.  
Xu, Z., Liu, Y., Nie, W., Sun, P., Chi, X., and Ding, A.: Evaluating the measurement interference of wet rotating-denuder-ion chromatography in measuring atmospheric HONO in a highly polluted area, *Atmos. Meas. Tech.*, 12, 6737-6748, 10.5194/amt-12-6737-2019, 2019.
